# Supplementary material for: Phylogeographical Analysis of the Freshwater Gudgeon Huigobio chenhsienensis (Cypriniformes: Gobionidae) in Southern China
Source: MDPI journal article supplement (doi:10.3390/life12071024), 2022-07-09
Supplement: s1 [file s1]

## Supplementary Materials

# **Phylogeographical Analysis of the Freshwater Gudgeon *Huigobio chenhsienensis* (Cypriniformes: Gobionidae) in Southern China**

**Xishu Yang , Xiaomin Ni , and Cuizhang Fu \***

Ministry of Education Key Laboratory for Biodiversity Science and Ecological Engineering,  
Coastal Ecosystems Research Station of the Yangtze River Estuary, Institute of Biodiversity  
Science and Institute of Eco-Chongming, School of Life Sciences, Fudan University, Shanghai,  
200082, China; yangxishu1990@163.com (X.Y.); 18110700109@fudan.edu.cn (X.N.);  
czfu@fudan.edu.cn (C.F.)

\* Correspondence: czfu@fudan.edu.cn



**Table S1.** Reviews of the genetic diversity of freshwater fishes endemic to southern China revealed by mitochondrial genes

| Category | Order         | Species                           | Basin                                                                                                                                                             | $h$    | $\pi$  | References |
|----------|---------------|-----------------------------------|-------------------------------------------------------------------------------------------------------------------------------------------------------------------|--------|--------|------------|
| II       | Cypriniformes | <i>Sinibrama macrops</i>          | Qiantang River, Cao'e River                                                                                                                                       | 0.9610 | 0.0044 | [72]       |
|          |               | <i>Schizothorax nukiangensis</i>  | Nujiang River                                                                                                                                                     | 0.9650 | 0.0024 | [73]       |
|          |               | <i>Acrossocheilus longipinnis</i> | Pearl River                                                                                                                                                       | 0.6859 | 0.0036 | [74]       |
| IV       | Cypriniformes | <i>Aphyocypris normalis</i>       | Pearl River, Jianjiang River, Moyang River, Beilun River, Nandu River, Wanquan River, Zhubijang River, Lingshui River, Changhua River                             | 1.0000 | 0.0149 | [14]       |
|          |               | <i>Onychostoma lepturum</i>       | Nandu River, Wanquan River, Lingshui River, Changhua River                                                                                                        | 0.9420 | 0.0229 | [17]       |
|          |               | <i>Tanichthys albonubes</i>       | Luo River, Pearl River, Beilun River, Red River, Changhua River                                                                                                   | 0.9700 | 0.0516 | [75]       |
|          |               | <i>Poropuntius huangchuchieni</i> | Mekong River, Red River, Nujiang River                                                                                                                            | 0.9856 | 0.0287 | [11]       |
|          |               | <i>Garra orientalis</i>           | Min River, Jiulong River, Pearl River, Moyang River, Wanquan River, Nandu River, Changhua River                                                                   | 0.9810 | 0.0074 | [18]       |
|          |               | <i>Opsariichthys hainanensis</i>  | Tan River, Moyang River, Jianjiang River, Nanliujiang River, Red River, Longwei River, Longshou River, Lingshui River, Wanquan River, Nandu River, Changhua River | 0.9460 | 0.0149 | [76]       |
|          | Perciformes   | <i>Coreoperca whiteheadi</i>      | Yangtze River, Qiantang River, Moyang River, Pearl River                                                                                                          | 0.8048 | 0.0601 | [15]       |
|          | Siluriformes  | <i>Glyptothorax fokiensis</i>     | Yangtze River, Min River, Jiulong River, Hanjiang River, Pearl River, Moyang River                                                                                | 0.9920 | 0.0406 | [13]       |
|          |               | <i>Glyptothorax hainanensis</i>   | Jianjiang River, Lianjiang River, Nanliujiang River, Wanquan River                                                                                                | 1.0000 | 0.0188 | [13]       |

**Table S2.** Reviews of the phylogeographical patterns of freshwater fishes endemic to southern China revealed by mitochondrial genes

| Pattern                         | Order         | Species                           | References |
|---------------------------------|---------------|-----------------------------------|------------|
| I                               | Cypriniformes | <i>Hemibagrus guttatus</i>        | [65]       |
|                                 |               | <i>Aphyocypris normalis</i>       | [14]       |
|                                 |               | <i>Tanichthys albonubes</i>       | [75]       |
|                                 |               | <i>Poropuntius huangchuchieni</i> | [11]       |
|                                 | Perciformes   | <i>Coreoperca whiteheadi</i>      | [15]       |
|                                 | Siluriformes  | <i>Glyptothorax fokiensis</i>     | [13]       |
| <i>Glyptothorax hainanensis</i> |               | [13]                              |            |
| II                              | Cypriniformes | <i>Schizothorax nukiangensis</i>  | [73]       |
|                                 |               | <i>Acrossocheilus longipinnis</i> | [74]       |
|                                 |               | <i>Onychostoma lepturum</i>       | [17]       |
|                                 |               | <i>Opsariichthys hainanensis</i>  | [76]       |
|                                 | Siluriformes  | <i>Hemibagrus macropterus</i>     | [16]       |
| V                               | Cypriniformes | <i>Garra orientalis</i>           | [18]       |

**Table S3.** Primers and annealing temperature used in PCR amplification of mitochondrial genomes

| Fragment | Gene     | Site        | Name of primer | Sequence (5'-3')             | Source     | Annealing temperature |
|----------|----------|-------------|----------------|------------------------------|------------|-----------------------|
| 1        | 12S-16S  | 72-1479     | T-Gob12SF      | AAGGCATGGTCCYGACCTTA         | [27]       | 55.4 °C               |
|          |          |             | CGob16sR       | TTCGGTAGGTCTRTCACTTC         | [27]       |                       |
| 2        | Val-ND1  | 1066-2870   | CGobValF       | ACACCGAGAAGACATCCA           | [77]       | 54.3 °C               |
|          |          |             | CGobLeuR1      | GGAAGAGGAYTTGAACC            | [27]       |                       |
| 3        | 16S-ND2  | 2572-4072   | CGobND1F       | GCAGCCGCTATTAAGGGTT          | [27]       | 52.3 °C               |
|          |          |             | CYMPHND1R      | TTTATTATGAGAATGTTGGC         | This study |                       |
| 4        | Ile-COI  | 3870-5570   | T-SD-IleF      | GCCCAAGGACCACTTTGATAG        | [27]       | 52.5 °C               |
|          |          |             | CGobCo1R2      | CCAAATACRAGATARAGGGT         | [77]       |                       |
| 5        | Asn-Ser  | 5312-7109   | LY-AsnF        | AGCGAGCATCCATCTACTT          | [27]       | 54.6 °C               |
|          |          |             | CARSerR        | GGTYATGTGACTGGCTTGA          | [27]       |                       |
| 6        | COI-ATP6 | 6958-8866   | TGobCOIF       | TGAGAAGCCTTYGCCGCYAAACG      | [27]       | 52.4 °C               |
|          |          |             | TGobATP6R      | GCTTGGTGTGCCATTARACGTTTTCTTG | This study |                       |
| 7        | ATP6-Arg | 8528-10066  | ZXSATP6F       | AATCAACCAACMGTAGCYCT         | This study | 53.3 °C               |
|          |          |             | CGobArgR       | CTGAGYCGAAATCAGAGG           | [27]       |                       |
| 8        | Gly-ND4  | 9665-11020  | CGobGlyF       | CTTCCAATYATTTAGYCTTGG        | [77]       | 53.5 °C               |
|          |          |             | NMIND4R        | TGCAACAGGGGCYTCTAC           | This study |                       |
| 9        | ND4L-Leu | 10660-12010 | TGobND4FS      | TAGCCAGCCAAAAYCACAT          | This study | 54.5 °C               |
|          |          |             | CGobLeuR       | TGGAYTTGCACCAAGAGT           | [27]       |                       |

**Table S3** (*continued*)

| Fragment | Gene     | Site        | Name of primer | Sequence (5'-3')       | Source     | Annealing temperature |
|----------|----------|-------------|----------------|------------------------|------------|-----------------------|
| 10       | His-ND5  | 11822-13375 | CGobSerF1-M    | ACYCACCRAGGAAGGACA     | This study | 50.0 °C               |
|          |          |             | CYND5R         | ATAATTGAYCCYGAGCA      | This study |                       |
| 11       | ND5-CYTB | 12949-14471 | TGobND5F       | GTAGCTTTCTCRACATC      | This study | 50.5 °C               |
|          |          |             | NMICYTBR       | CGTAGGCTTGCCATTATT     | This study |                       |
| 12       | ND6-Pro  | 14322-15680 | CGluF          | TCTTGCTCGGAYTTTAACCGAG | [26]       | 58.0 °C               |
|          |          |             | CThrR          | CCTCCGATCTTCGGATTACAAG | [26]       |                       |
| 13       | Thr-12S  | 15566-217   | HemDloopF      | AAAGCATCGGTCTTGTAATC   | [27]       | 53.0 °C               |
|          |          |             | HemDloopR      | CTTGGCTAGGCGTCTTGG     | [27]       |                       |

**Table S4.** Sampling localities and source of mitochondrial genome for *Huigobio* and outgroup taxa

| Species                                                                                     | Locality                                         | Genbank accession number | References |
|---------------------------------------------------------------------------------------------|--------------------------------------------------|--------------------------|------------|
| <i>Huigobio</i>                                                                             |                                                  |                          |            |
| <i>Huigobio chenhsienensis</i>                                                              | Xinchang, Zhejiang Province, China               | ON316823                 | This study |
| <i>Huigobio exilicauda</i>                                                                  | Shixing, Guangdong Province, China               | ON316824                 | This study |
| <i>Huigobio heterocheilus</i>                                                               | Yanling, Hunan Province, China                   | ON316825                 | This study |
| <i>Microphysogobio</i>                                                                      |                                                  |                          |            |
| <i>Microphysogobio jeon</i>                                                                 | Buyeo-gun, South Korea                           | MN581867                 | [78]       |
| <i>Microphysogobio springeri</i> (=Abbottina<br><i>springeri</i> = <i>Biwia springeri</i> ) |                                                  | AP011360                 | [37]       |
| <i>Microphysogobio brevirostris</i>                                                         |                                                  | KF319122                 | [79]       |
| <i>Microphysogobio koreensis</i>                                                            | South Korea                                      | FJ515920                 | [80]       |
| <i>Microphysogobio longidorsalis</i>                                                        | South Korea                                      | AP011394                 | [37]       |
| <i>Microphysogobio rapidus</i>                                                              | South Korea                                      | MH713708                 | [81]       |
| <i>Microphysogobio alticorpus</i>                                                           |                                                  | KC762939                 | [82]       |
| <i>Biwia</i>                                                                                |                                                  |                          |            |
| <i>Biwia zezera</i>                                                                         | Gifu, Japan                                      | AB250107                 | [83]       |
| <i>Platysmacheilus</i>                                                                      |                                                  |                          |            |
| <i>Platysmacheilus exiguus</i>                                                              | Yangsuo, Guangxi Zhuang Autonomous Region, China | ON316826                 | This study |
| <i>Gobiobotia</i>                                                                           |                                                  |                          |            |
| <i>Gobiobotia macrocephala</i>                                                              | South Korea                                      | FJ515918                 | [84]       |
| <i>Xenophysogobio</i>                                                                       |                                                  |                          |            |
| <i>Xenophysogobio nudicorpa</i>                                                             | Jiangjin, Chongqing Municipality, China          | KU314698                 | [85]       |

**Table S4** (continued)

| Species                                                    | Locality                                          | Genbank accession number | References                 |
|------------------------------------------------------------|---------------------------------------------------|--------------------------|----------------------------|
| <i>Hemibarbus</i>                                          |                                                   |                          |                            |
| <i>Hemibarbus nummifer</i> (= <i>Belligobio nummifer</i> ) | Wuyishan, Fujian Province, China                  | KJ413052                 | [86]                       |
| <i>Hemibarbus longirostris</i>                             | Ganwon-do, South Korea                            | DQ347952                 | [87]                       |
| <i>Squalidus</i>                                           |                                                   |                          |                            |
| <i>Squalidus longifilis</i>                                | Fengcheng, Liaoning Province, China               | MT767747                 | [27]                       |
| <i>Abbottina</i>                                           |                                                   |                          |                            |
| <i>Abbottina binhi</i>                                     | Pingguo, Guangxi Zhuang Autonomous Region, China  | MK852688                 | [88]                       |
| <i>Pseudogobio</i>                                         |                                                   |                          |                            |
| <i>Pseudogobio anderssoni</i>                              | Anyi, Jiangxi Province, China                     | MN883563                 | [89]                       |
| <i>Pseudogobio guilinensis</i>                             | Pingle, Guangxi Zhuang Autonomous Region, China   | MN883564                 | [89]                       |
| <i>Saurogobio</i>                                          |                                                   |                          |                            |
| <i>Saurogobio dabryi</i>                                   | Xiushui, Jiangxi Province, China                  | KU314696                 | [85]                       |
| <i>Saurogobio gymnocheilus</i>                             | Hengdong, Hunan Province, China                   | MK860911                 | [90]                       |
| <i>Gobio</i>                                               |                                                   |                          |                            |
| <i>Gobio acutipinnatus</i>                                 | Bu'erjin, Xinjiang Uygur Autonomous Region, China | MT632635                 | [91]                       |
| <i>Gobio gobio</i>                                         | Plana                                             | AB239596                 | [92]                       |
| <i>Mesogobio</i>                                           |                                                   |                          |                            |
| <i>Mesogobio lachneri</i>                                  | Linjiang, Jilin Province, China                   | OL678457                 | unpublished (from Genbank) |
| <i>Acanthogobio</i>                                        |                                                   |                          |                            |
| <i>Acanthogobio guentheri</i>                              |                                                   | MF787799                 | unpublished (from Genbank) |
| <i>Romanogobio</i>                                         |                                                   |                          |                            |
| <i>Romanogobio ciscaucasicus</i>                           |                                                   | AP011259                 | unpublished (from Genbank) |



**Table S4** (continued)

| Species                                                        | Locality                             | Genbank accession number | References |
|----------------------------------------------------------------|--------------------------------------|--------------------------|------------|
| <i>Gnathopogon</i>                                             |                                      |                          |            |
| <i>Gnathopogon elongatus</i>                                   | Japan                                | AB218687                 | [92]       |
| <i>Gnathopogon imberbis</i> (= <i>Gnathopogon polytaenia</i> ) |                                      | KM086722                 | [93]       |
| <i>Coreoleuciscus</i>                                          |                                      |                          |            |
| <i>Coreoleuciscus splendidus</i>                               | South Korea                          | EU848546                 | [94]       |
| <i>Coreoleuciscus aeruginos</i> *                              | South Korea                          | DQ347951                 | [94]       |
| <i>Pseudorasbora</i>                                           |                                      |                          |            |
| <i>Pseudorasbora elongata</i>                                  | Wuyuan, Jiangxi Province, China      | KF245485                 | [95]       |
| <i>Pungtungia</i>                                              |                                      |                          |            |
| <i>Pungtungia herzi</i>                                        | South Korea                          | KF006339                 | [96]       |
| <i>Pseudopungtungia</i>                                        |                                      |                          |            |
| <i>Pseudopungtungia nigra</i>                                  | South Korea                          | EU332752                 | [97]       |
| <i>Sarcocheilichthys</i>                                       |                                      |                          |            |
| <i>Sarcocheilichthys parvus</i>                                | Yongjia, Zhejiang Province, China    | JX456224                 | [98]       |
| <i>Sarcocheilichthys nigripinnis</i>                           | Kaihua, Zhejiang Province, China     | JX401522                 | [99]       |
| <i>Paracanthobrama</i>                                         |                                      |                          |            |
| <i>Paracanthobrama guichenoti</i>                              |                                      | KJ645748                 | [100]      |
| <i>Coreius</i>                                                 |                                      |                          |            |
| <i>Coreius guichenoti</i>                                      | Banan, Chongqing Municipality, China | JF906108                 | [101]      |
| <i>Coreius heterokon</i>                                       | Banan, Chongqing Municipality, China | JF906110                 | [101]      |
| <i>Ladislavia</i>                                              |                                      |                          |            |
| <i>Ladislavia taczanowskii</i>                                 | Kuandian, Liaoning Province, China   | MT897995                 | [102]      |

**Table S4** (*continued*)

| Species                           | Locality                                      | Genbank accession number | References |
|-----------------------------------|-----------------------------------------------|--------------------------|------------|
| <i>Acheilognathus</i>             |                                               |                          |            |
| <i>Acheilognathus macropterus</i> | Wuhan, Hubei Province, China                  | KJ499466                 | [103]      |
| <i>Rhodeus</i>                    |                                               |                          |            |
| <i>Rhodeus sericeus</i>           | Xiaoxing'anling, Heilongjiang Province, China | KM052222                 | [104]      |
| <i>Tanakia</i>                    |                                               |                          |            |
| <i>Tanakia limbata</i>            | Okayama, Japan                                | KM386633                 | [105]      |

\*The scientific name in Genbank is *Coreoleuciscus splendidus* that it is revised as *Coreoleuciscus aeruginos* by Song and Bang [106].

**Table S5.** Comparisons among six models of biogeography analyses in ancestral area reconstruction of *H. chenhsienensis*

| Model             | LnL           | Parameter       |                 |                 | Weight          |                 |
|-------------------|---------------|-----------------|-----------------|-----------------|-----------------|-----------------|
|                   |               | <i>d</i>        | <i>e</i>        | <i>j</i>        | AIC_wt          | AICc_wt         |
| DEC               | -30.11        | 1.80E-02        | 1.00E-12        | 0.00            | 4.60E-03        | 5.07E-03        |
| DEC+J             | -25.77        | 1.00E-12        | 1.00E-12        | 5.48E-03        | 1.29E-01        | 1.29E-01        |
| DIVALIKE          | -32.23        | 3.08E-02        | 8.47E-03        | 0.00            | 5.51E-04        | 6.08E-04        |
| <b>DIVALIKE+J</b> | <b>-23.87</b> | <b>1.00E-12</b> | <b>1.00E-12</b> | <b>5.40E-03</b> | <b>8.65E-01</b> | <b>8.65E-01</b> |
| BAYAREALIKE       | -50.07        | 4.77E-02        | 4.01E-01        | 0.00            | 9.80E-12        | 1.08E-11        |
| BAYAREALIKE+J     | -31.56        | 1.00E-07        | 8.35E-02        | 8.72E-03        | 3.97E-04        | 3.97E-04        |

The optimal model is highlighted in bold based on LnL and weight values.
